# Supplementary material for: Caenorhabditis elegansbehavioral genetics: where are the knobs?
Source: Springer Nature journal article supplement (doi:10.1186/1741-7007-8-69), 2010-06-08
Supplement: 12915_2010_365_MOESM2_ESM.pdf [file 12915_2010_365_MOESM2_ESM.pdf]

(a)

Digestive enzymes

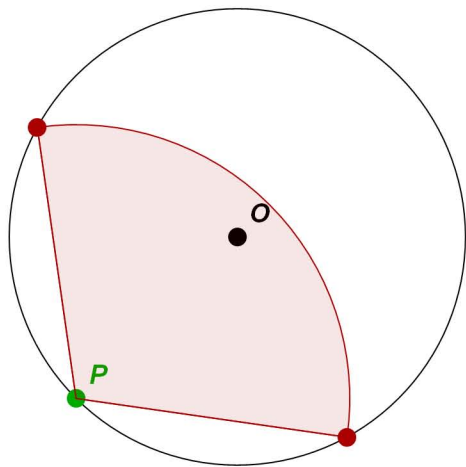

Feeding rate

(b)

Digestive enzymes

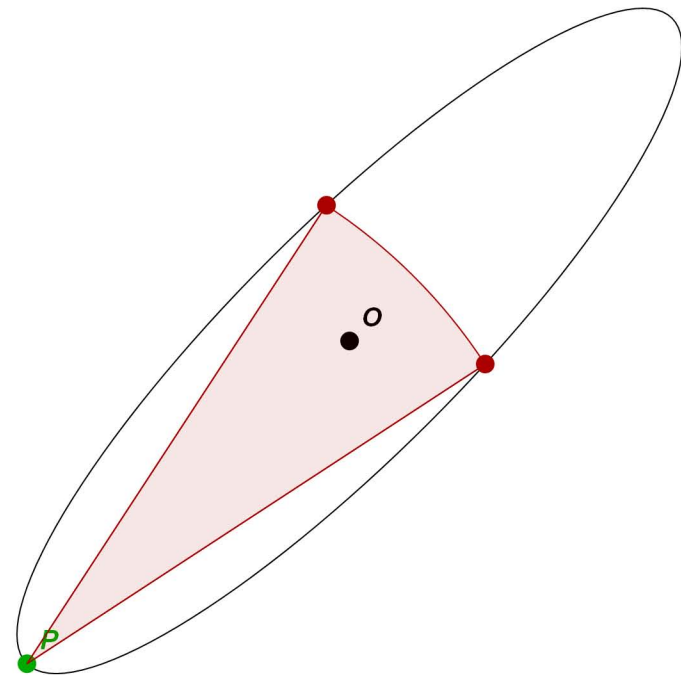

Feeding rate
